# Supplementary material for: Rapid plasma membrane reorganisation and endocytosis in HER2 breast cancer cells incubated with trastuzumab decorated polymer nanoparticles
Source: Royal Society of Chemistry journal article supplement (doi:10.1039/d5pm00168d), 2026-01-01
Supplement: d5pm00168d2.pdf [file d5pm00168d2.pdf]

Dox Concentration (mg)

PLGA-NP

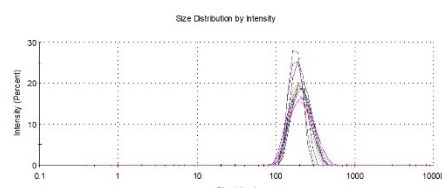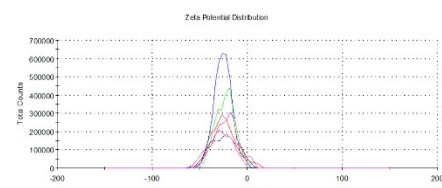

NPs

PLGA-Tz

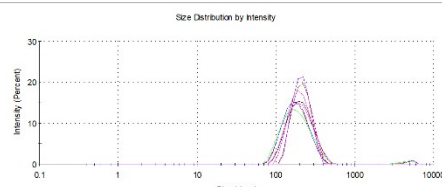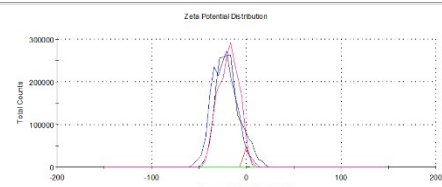

PLGA-RhB

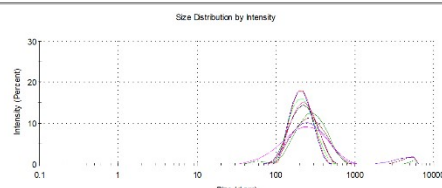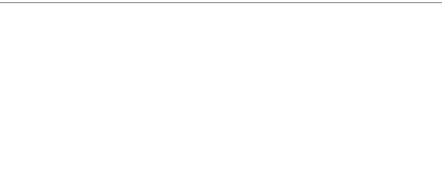

PLGA-RhB-Tz

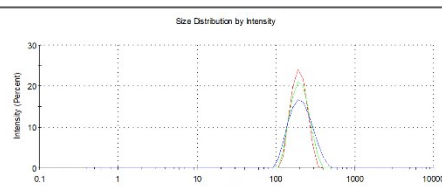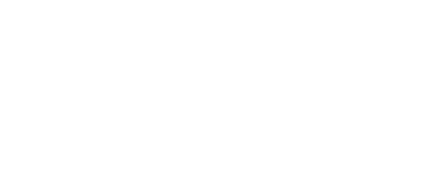

PLGA-Dox

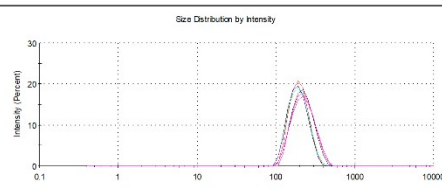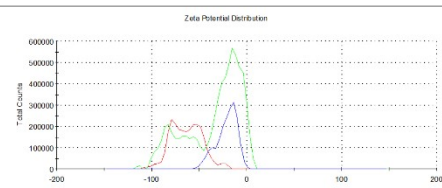

PLGA-Dox-9Tz

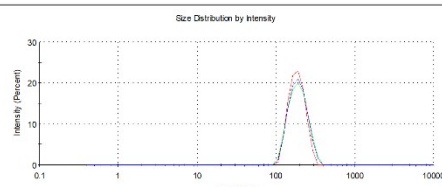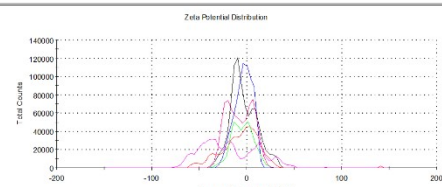

PLGA-Dox-21Tz

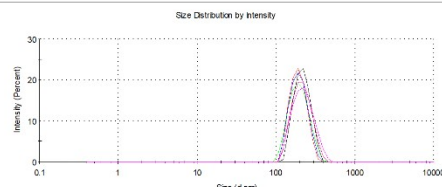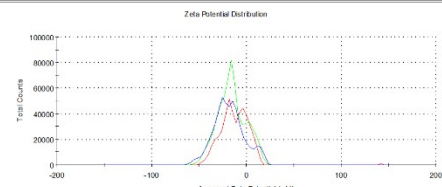

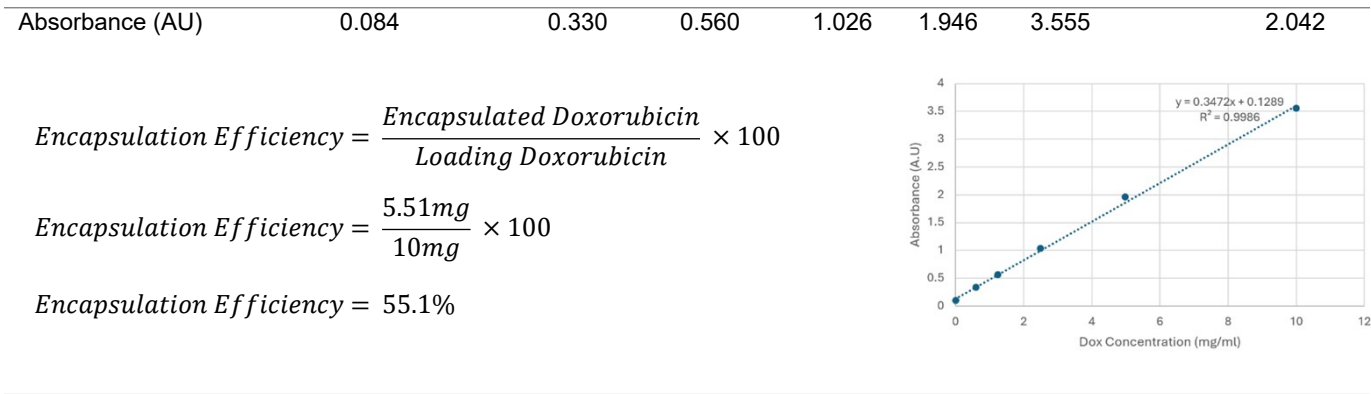

Supplementary Figure 2: Representative example of a calculation to determine encapsulation efficiency of Dox in PLGA NPs. Absorbance (490nm) was measured using a Tecan Infinite M Plex Plate Reader.

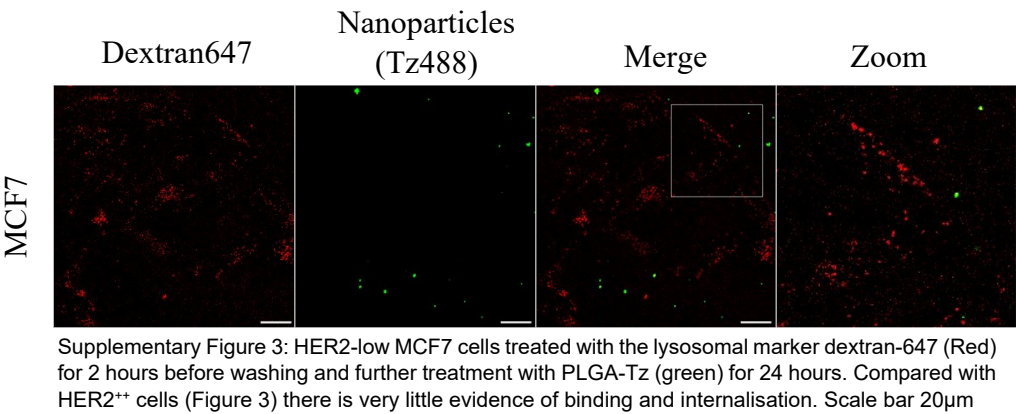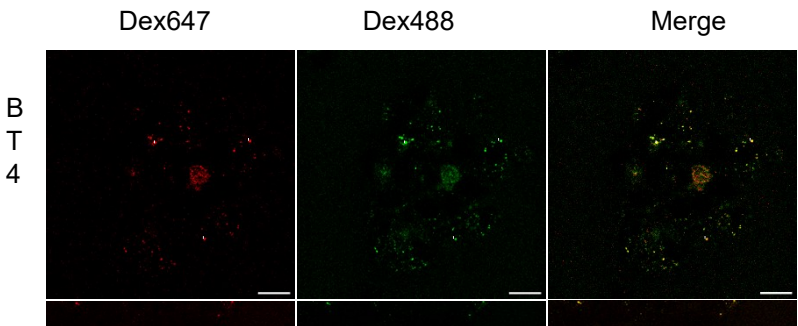

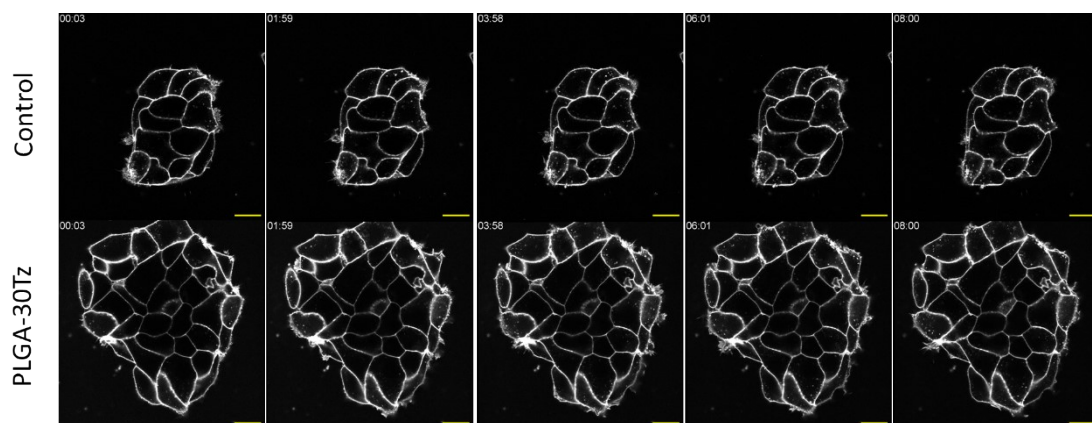

Supplementary Figure 5: BT474 cells pre-treated with CellMask Deep Red were treated with PLGA-21Tz and imaged for 10 minutes capturing plasma membrane reorganisation. Images shown are from frames taken approximately 2 minutes apart. Minor increases in membrane activity are observed, albeit not as dynamic as those seen in the SKBR3 cells. Scale bar 20 $\mu$ m.

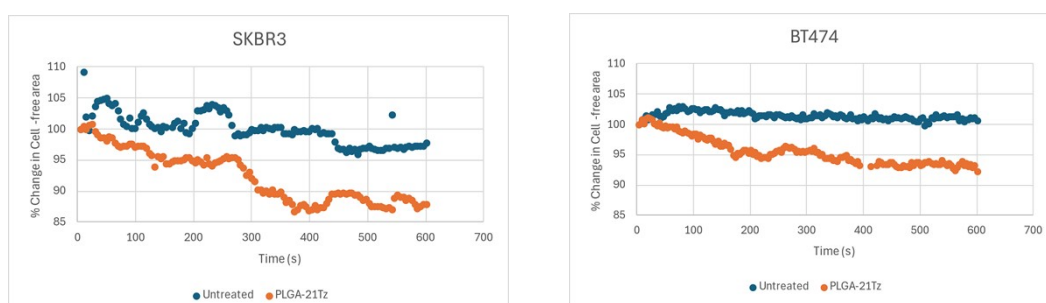

Supplementary Figure 6: Change in area over time across cells treated with PLGA-21Tz in Figure 4 and Supplementary Figure 5. Increases in total cell area is reflected by a decrease in cell-free area. In the SKBR3 cells the untreated cells show some variation however it does not substantially deviate from the baseline, in comparison the PLGA-21Tz treated cells show 10% reduction in cell-free area.
